# Supplementary material
Source: bioRxiv or medRxiv preprint supplement (http://biorxiv.org/highwire/filestream/27136/field_highwire_adjunct_files/0/089185-1.pdf)
Supplement: Supplementary file [file 089185-1.pdf]

**Supplementary Figures:**

**Figure S1:**

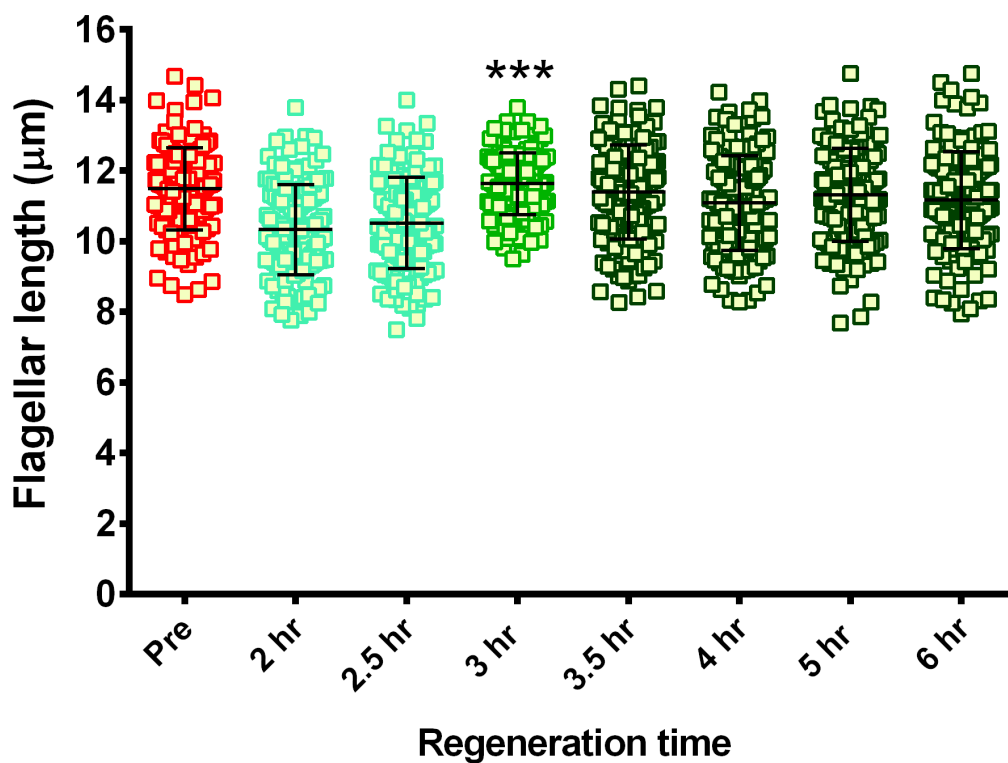

Figure S1: Wild type flagellar-length distribution at various time intervals during the regeneration after amputation. Pre-deflagellation non-synchronous cells (pre) are shown in red. Regeneration was carried out for indicated times after deflagellation by pH shock (green). Lighter and darker green indicates before and after the time of F-L synchronization respectively. Combined data from three independent experiments are represented (N=50/each, total 150). F test was performed for comparing variance (control= non-synchronous cells). Bonferroni corrected  $\alpha_{\text{altered}} = 0.007$ . Asterisk indicates significant difference below  $\alpha_{\text{altered}}$  (\*\*p=0.0006). Standard deviations are expressed as bar graphs in the lower panel. The filled SD bar represents F-L synchronization.

**Figure S2:**

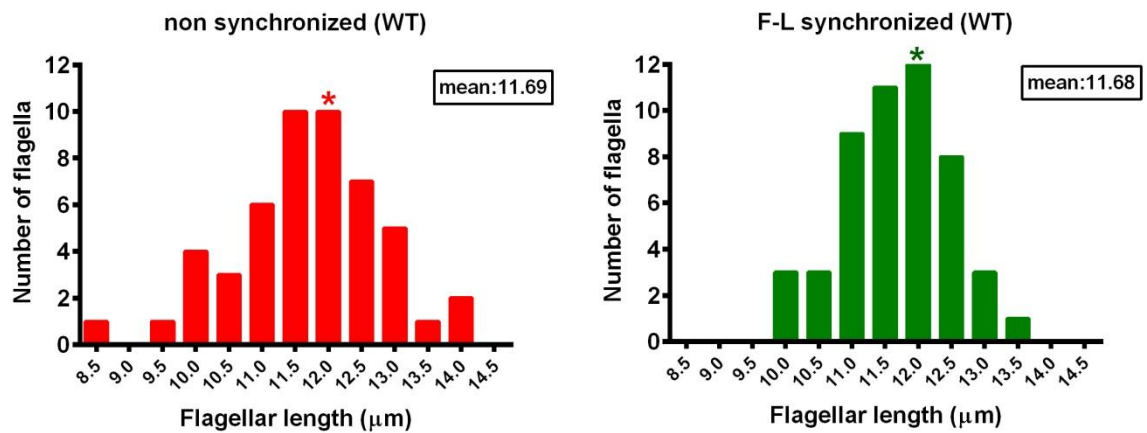

**Figure S2:** Distribution of flagellar length in wild type cells before and after F-L synchronization. Non-synchronized cells (red) and synchronized cells (green). N=50. Asterisk= mean flagellar length.

**Figure S3:**

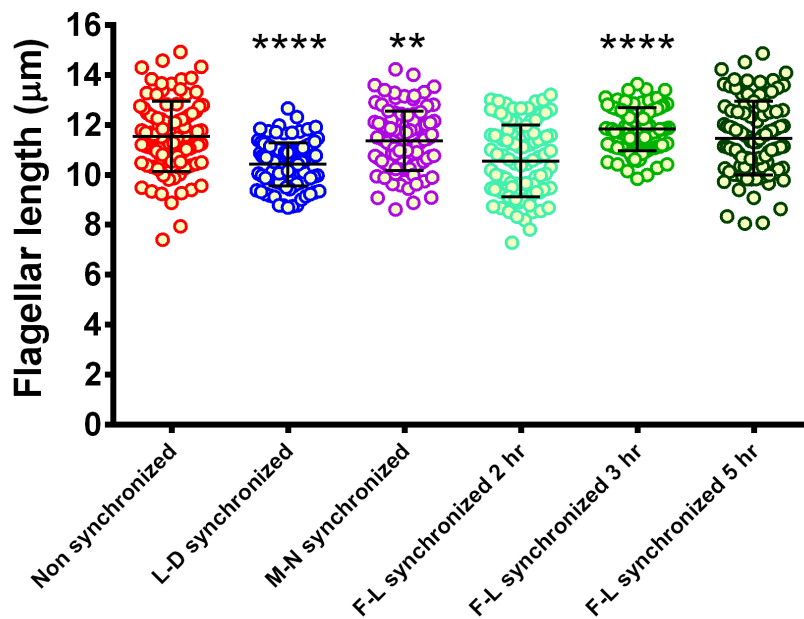

**Figure S3:** Pre-deflagellation flagellar length distribution before precursor pool determination. These data confirm Fig 1 data showing the narrowest flagellar length distribution for L-D and F-L 3 hour synchronized cells. N=100 flagella. Bars are mean and standard deviation. F test was performed for comparing variance (control= non-synchronous cells). Asterisks indicate significant differences (\*\*\*\*  $p \leq 0.0001$ , \*\*  $p \leq 0.01$ ).

## Supplementary table:

**Table S1: Flagellar length distribution after different synchronization methods.**

|             | <b>Non-synchronized</b> | <b>L-D synchronized</b> | <b>M-N synchronized</b> | <b>F-L synchronized</b> |
|-------------|-------------------------|-------------------------|-------------------------|-------------------------|
| <b>Mean</b> | 11.54                   | 11.35                   | 12.11                   | 11.83                   |
| <b>SD</b>   | 1.401                   | 0.9614                  | 1.059                   | 0.8633                  |

**Table S2: Distribution of flagellar length during regeneration following deflagellation.**

|             | <b>Pre</b> | <b>2 hour</b> | <b>2.5 hour</b> | <b>3 hour</b> | <b>3.5 hour</b> | <b>4 hour</b> | <b>5 hour</b> | <b>6 hour</b> |
|-------------|------------|---------------|-----------------|---------------|-----------------|---------------|---------------|---------------|
| <b>Mean</b> | 11.70      | 11.00         | 11.40           | 11.68         | 12.12           | 11.64         | 11.54         | 11.26         |
| <b>SD</b>   | 1.117      | 1.221         | .9902           | .7587         | 1.117           | 1.225         | 1.324         | 1.472         |

**Table S3: Flagellar length distribution after length altering chemical treatment:**

| <b>Chem-ical</b> |         | <b>Non-synchronized</b> |       | <b>L-D synchronized</b> |        | <b>M-N synchronized</b> |        | <b>F-L synchronized</b> |        |
|------------------|---------|-------------------------|-------|-------------------------|--------|-------------------------|--------|-------------------------|--------|
|                  |         | Mean                    | SD    | Mean                    | SD     | Mean                    | SD     | Mean                    | SD     |
| <b>IBMX</b>      | Control | 11.03                   | 1.225 | 10.65                   | 1.029  | 11.35                   | 0.9315 | 10.70                   | 1.029  |
|                  | Treated | 7.063                   | 1.103 | 5.965                   | 1.122  | 6.657                   | 1.015  | 5.863                   | 1.015  |
| <b>LatB</b>      | Control | 12.11                   | 1.052 | 10.65                   | 1.029  | 11.31                   | 1.200  | 11.63                   | 0.8298 |
|                  | Treated | 9.122                   | 1.337 | 7.965                   | 1.164  | 9.079                   | 1.155  | 8.407                   | 0.8109 |
| <b>NaPPi</b>     | Control | 11.07                   | 1.195 | 10.42                   | 0.8714 | 10.89                   | 0.8654 | 11.94                   | 0.8855 |
|                  | Treated | 7.54                    | 1.165 | 6.198                   | 1.141  | 7.244                   | 1.324  | 6.449                   | 0.8925 |
| <b>LiCl</b>      | Control | 11.33                   | 1.118 | 10.42                   | 0.8714 | 12.10                   | 1.051  | 12.13                   | 0.8005 |
|                  | Treated | 14.49                   | 2.342 | 14.68                   | 1.479  | 15.53                   | 2.487  | 16.94                   | 1.468  |

**Table S4: Flagellar length distribution of length mutants during regeneration.**

|                 |      | Time After Regeneration |             |               |            |               |              |               |             |             |             |
|-----------------|------|-------------------------|-------------|---------------|------------|---------------|--------------|---------------|-------------|-------------|-------------|
| <i>lf4-7</i>    |      | <b>Pre</b>              | <b>2 hr</b> | <b>3 hr</b>   | <b>4hr</b> | <b>5 hr</b>   | <b>6hr</b>   | <b>7 hr</b>   | <b>8 hr</b> |             |             |
|                 | Mean | 20.8                    | 12.07       | 17.36         | 19.42      | 21.51         | <b>20.96</b> | 22.07         | 20.16       |             |             |
|                 | SD   | 3.64                    | 2.08        | 2.13          | 2.55       | 2.31          | <b>1.99</b>  | 3.19          | 3.61        |             |             |
|                 |      |                         |             |               |            |               |              |               |             |             |             |
| <i>shf1-253</i> |      | <b>Pre</b>              | <b>1 hr</b> | <b>1.5 hr</b> | <b>2hr</b> | <b>2.5 hr</b> | <b>3hr</b>   | <b>3.5 hr</b> | <b>4 hr</b> | <b>5 hr</b> | <b>6 hr</b> |
|                 | Mean | 6.4                     | 5.07        | 6.24          | 6.73       | <b>6.7</b>    | 7.13         | 6.78          | 6.54        | 6.77        | 6.56        |
|                 | SD   | 0.92                    | 0.96        | 0.92          | 0.81       | <b>0.56</b>   | 0.80         | 0.98          | 1.05        | 0.98        | 1.21        |
|                 |      |                         |             |               |            |               |              |               |             |             |             |
| <i>cnk2-1</i>   |      | <b>Pre</b>              | <b>2 hr</b> | <b>2.5 hr</b> | <b>3hr</b> | <b>3.5 hr</b> | <b>4 hr</b>  | <b>5 hr</b>   | <b>6 hr</b> |             |             |
|                 | Mean | 12.5                    | 9.61        | 10.55         | 11.12      | 11.20         | 11.64        | <b>12.2</b>   | 12.41       |             |             |
|                 | SD   | 1.05                    | 1.12        | 1.27          | 1.05       | 1.15          | 0.87         | <b>0.71</b>   | 1.01        |             |             |

**Table S5: Flagellar length distribution prior to and after cycloheximide (cyclo) treatment:**

|                     |      | <b>Non synchronized</b> | <b>L-D synchronized</b> | <b>M-N synchronized</b> | <b>F-L synchronized</b> |             |             |
|---------------------|------|-------------------------|-------------------------|-------------------------|-------------------------|-------------|-------------|
|                     |      |                         |                         |                         | <b>2 hr</b>             | <b>3 hr</b> | <b>5 hr</b> |
| <b>Before cyclo</b> | Mean | 11.54                   | 10.42                   | 11.36                   | 10.56                   | 11.83       | 11.46       |
|                     | SD   | 1.401                   | 0.871                   | 1.188                   | 1.444                   | 0.863       | 1.474       |
|                     |      |                         |                         |                         |                         |             |             |
| <b>After cyclo</b>  | Mean | 5.600                   | 4.191                   | 4.513                   | 5.409                   | 6.162       | 6.156       |
|                     | SD   | 1.583                   | 0.837                   | 0.917                   | 1.408                   | 1.097       | 1.54        |
